# Supplementary material for: Prolactin Inhibits BCL6 Expression in Breast Cancer Cells through a MicroRNA-339-5p-Dependent Pathway
Source: PubMed Central journal article supplement — J Breast Cancer. 2016 Mar 25;19(1):26–33. doi: 10.4048/jbc.2016.19.1.26 (PMC4822104; doi:10.4048/jbc.2016.19.1.26), 2016-03-25
Supplement: jbc-19-26-s001.pdf [file jbc-19-26-s001.pdf]

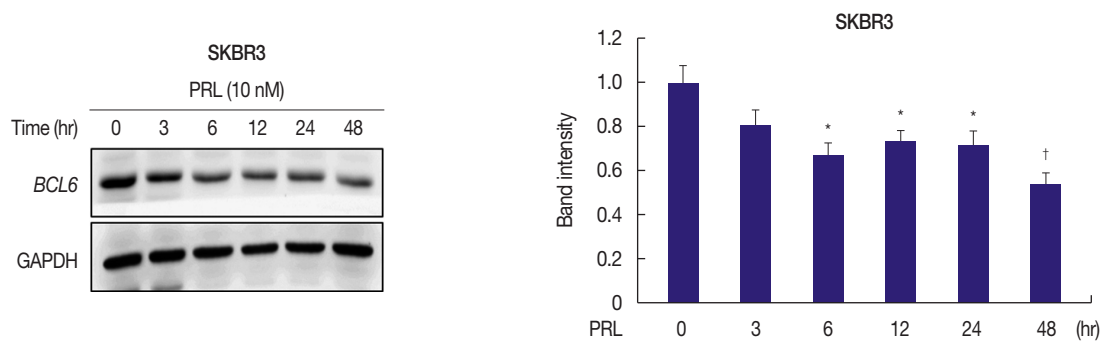

**Supplementary Figure 1.** PRL regulates *BCL6* expression in SKBR3 human breast cancer cells. (A) Western blot of representative over time showing protein levels of *BCL6* and GAPDH in SKBR3 cells treated with or without PRL for up to 48 hours. (B) Corresponding densitometry data of *BCL6* normalized to GAPDH loading controls.

PRL = prolactin; *BCL6* = B-cell lymphoma 6; GAPDH = glyceraldehyde-3-phosphate dehydrogenase.

\* $p < 0.05$ ; † $p < 0.01$ .
